# Supplementary material
Source: MDPI journal article supplement (https://www.mdpi.com/2504-5377/6/4/77)
Supplement: s1 [file s1]

# Supplementary materials

**Title:** Aggregation and conductivity in hot-grown petroporphyrin films

**Authors:** O.I. Koifman, A.I. Koptyaev, V.V. Travkin, P.A. Yunin, N.V. Somov, D.V. Masterov, and G.L. Pakhomov

## Figure S1

EAS of copper etioporphyrin films deposited on cold/hot substrate (standard ITO coated glass slides from Sigma-Aldrich)

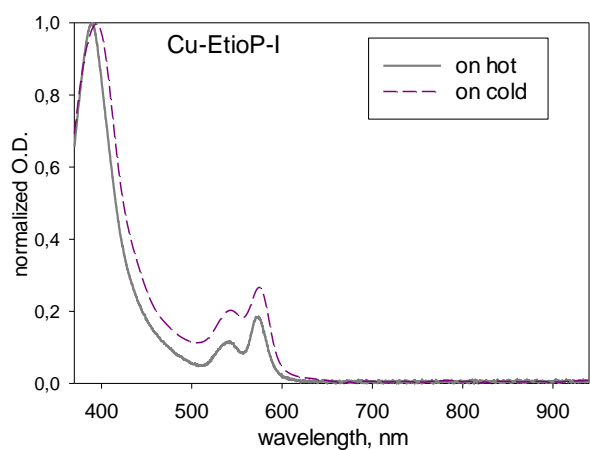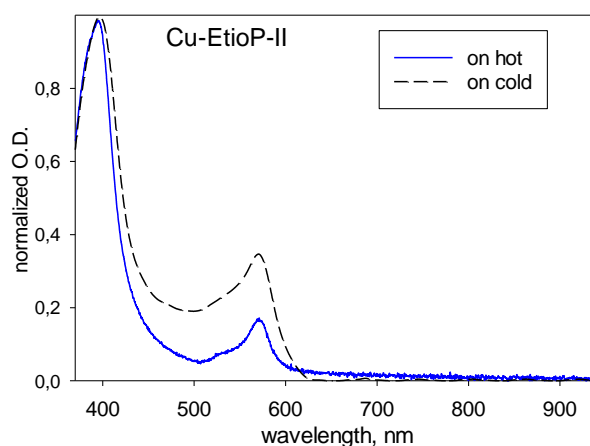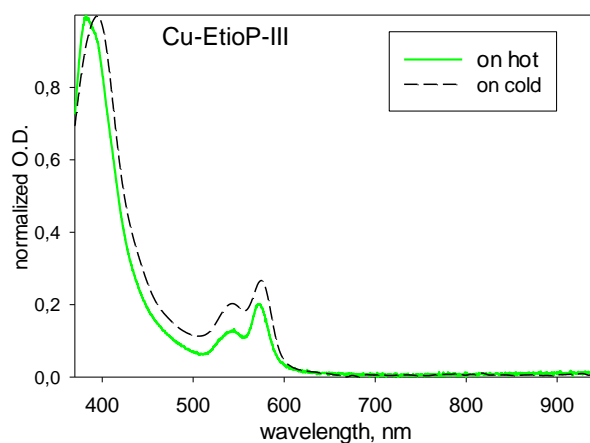

**Figure S2**

Comparison of SEM (top b/w panels, see Fig. 2) and AFM (bottom color panels) images of the surface of hot-grown Cu-etioP films on silicon wafer

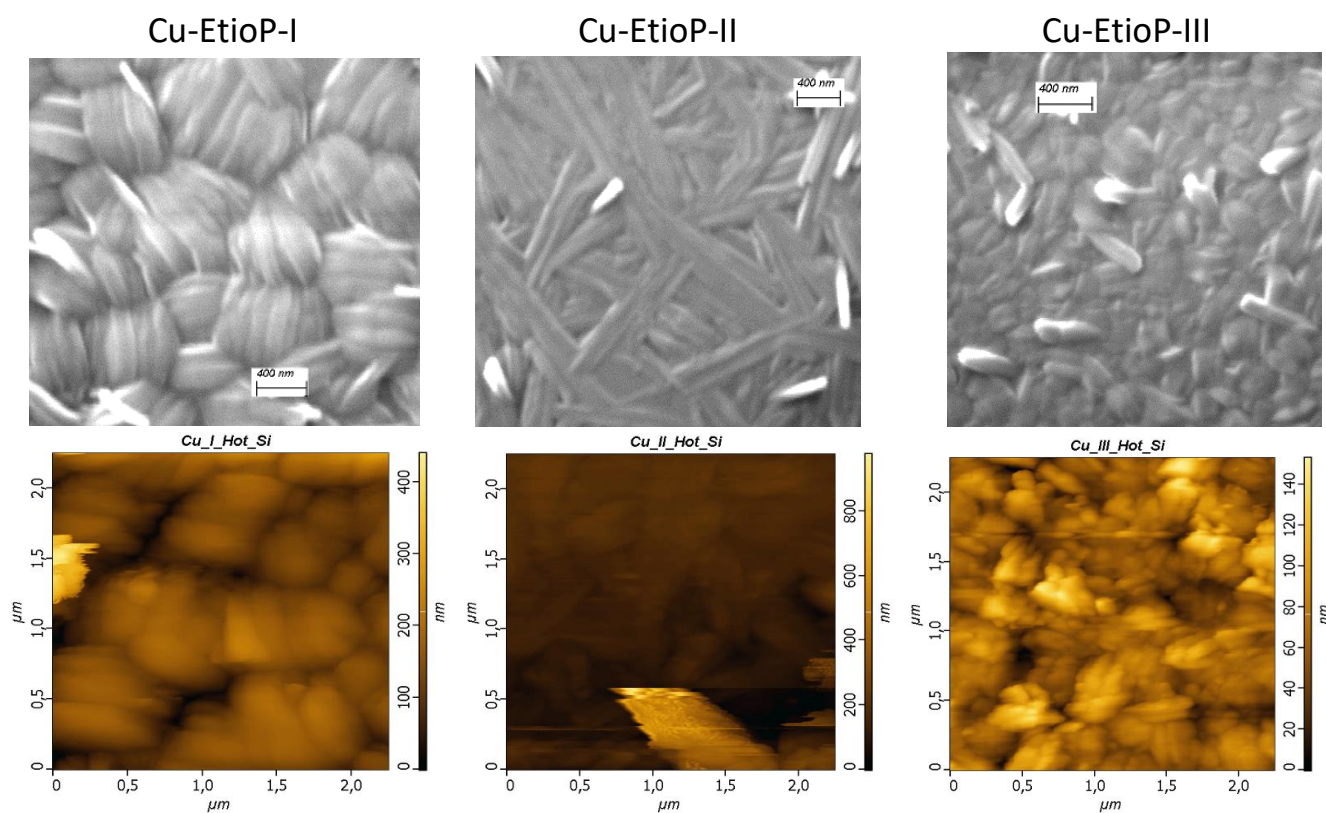

**Figure S3**

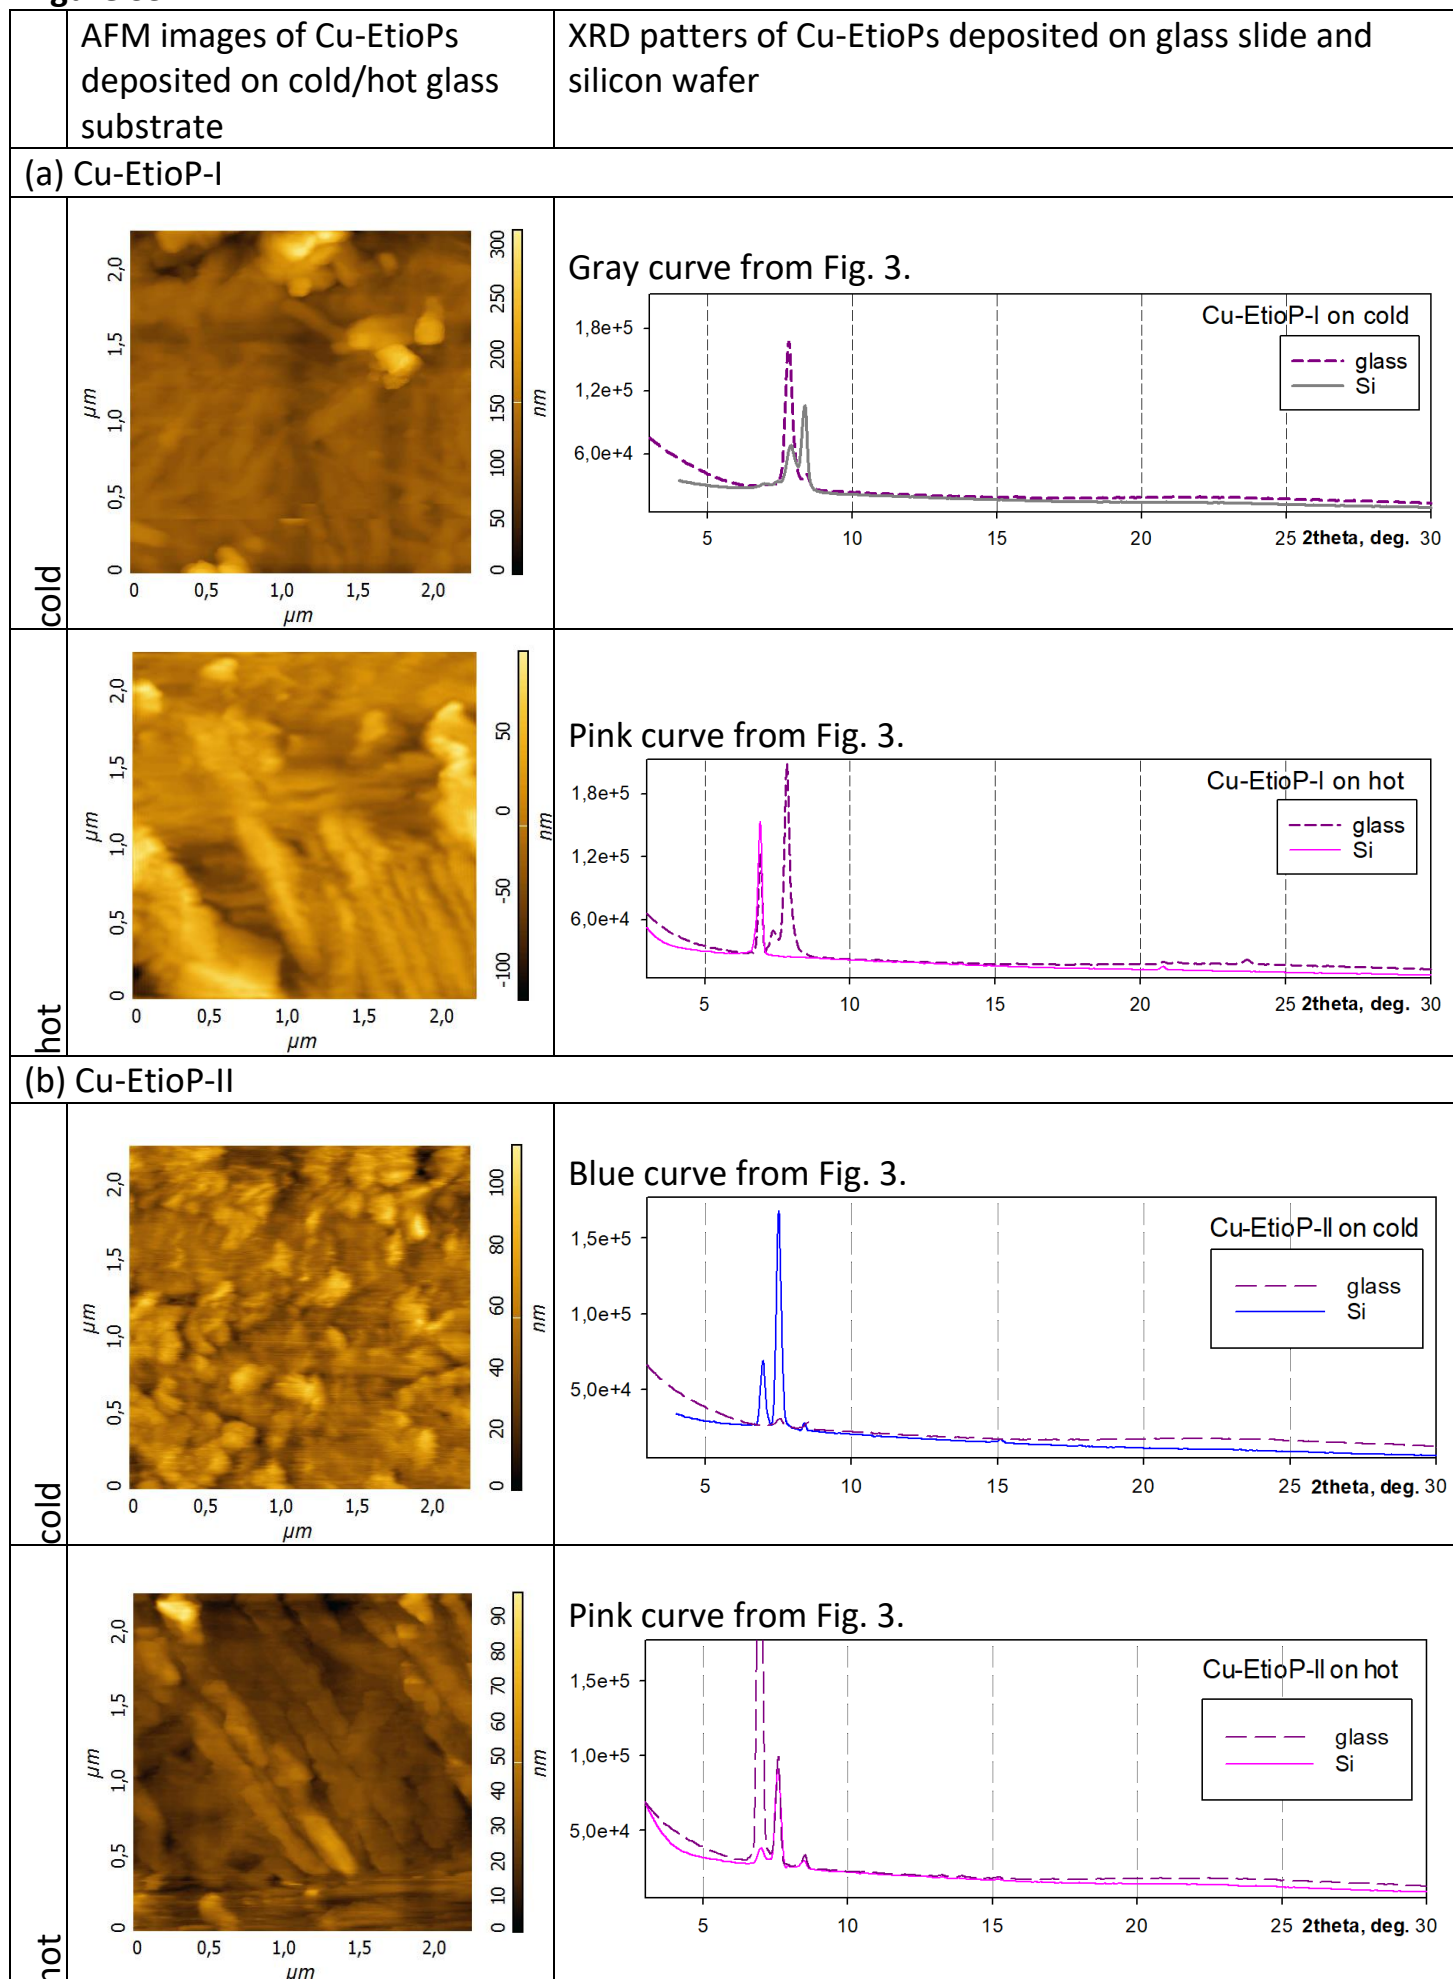

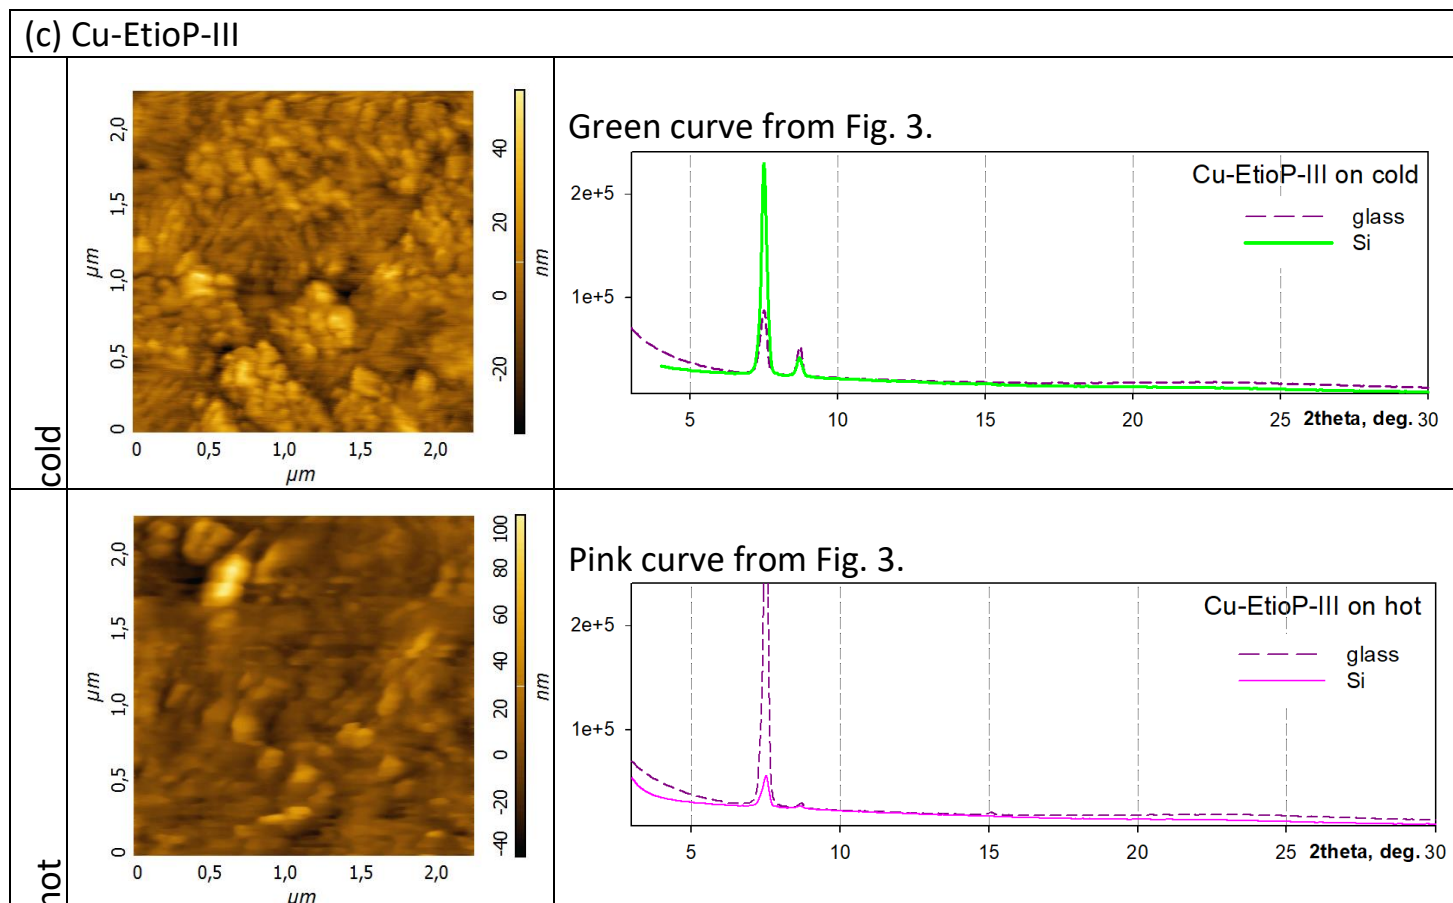

**Figure S4**

The XRD-patterns of Cu-EtioP-II films deposited either by drop-casting from the binary solution (toluene+DMF) or by vacuum evaporation on hot substrate, compared to the powder spectrum

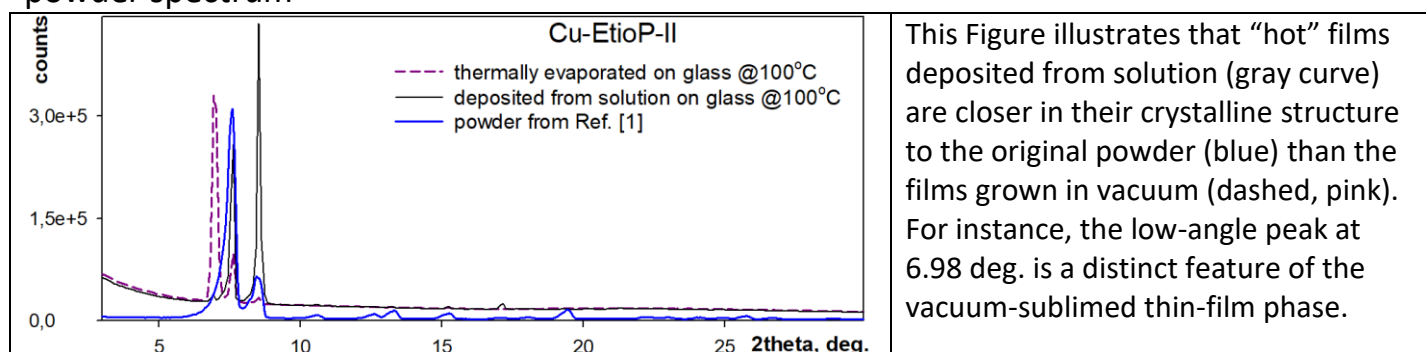

**Figure S5**

AFM images of the surface of Cu-etiochlorophyll-I films grown on various substrates at  $T_g = \text{cold}$

silicon wafer

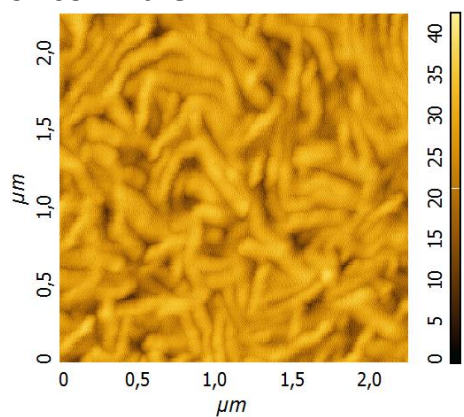

Ni-metallized ceramics

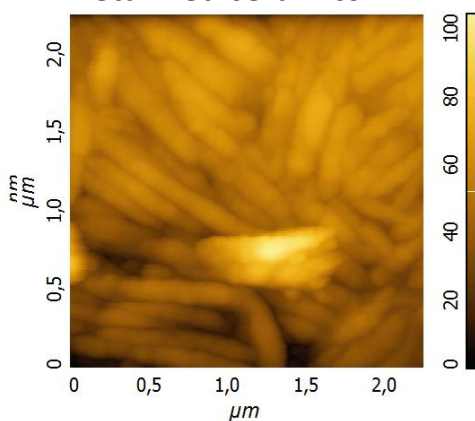

ceramics ( $\text{p-Al}_2\text{O}_3$ )

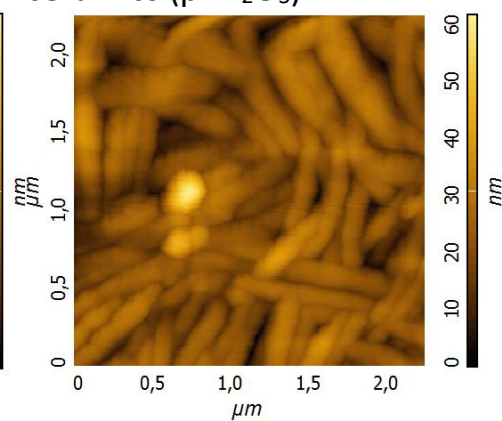

**Figure S6**

Photo of Cu-EtioP-I film vacuum-deposited on the IDE substrate

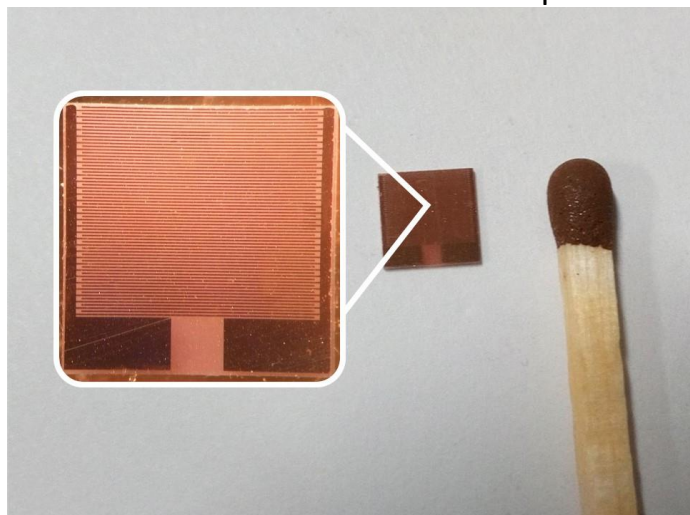



**Figure S7**

Dark and illuminated I-V dependences measured at room temperature in air-free conditions for three Cu-EtioP isomers vacuum-deposited on the substrates with IDE contacts shown in Fig. S6.

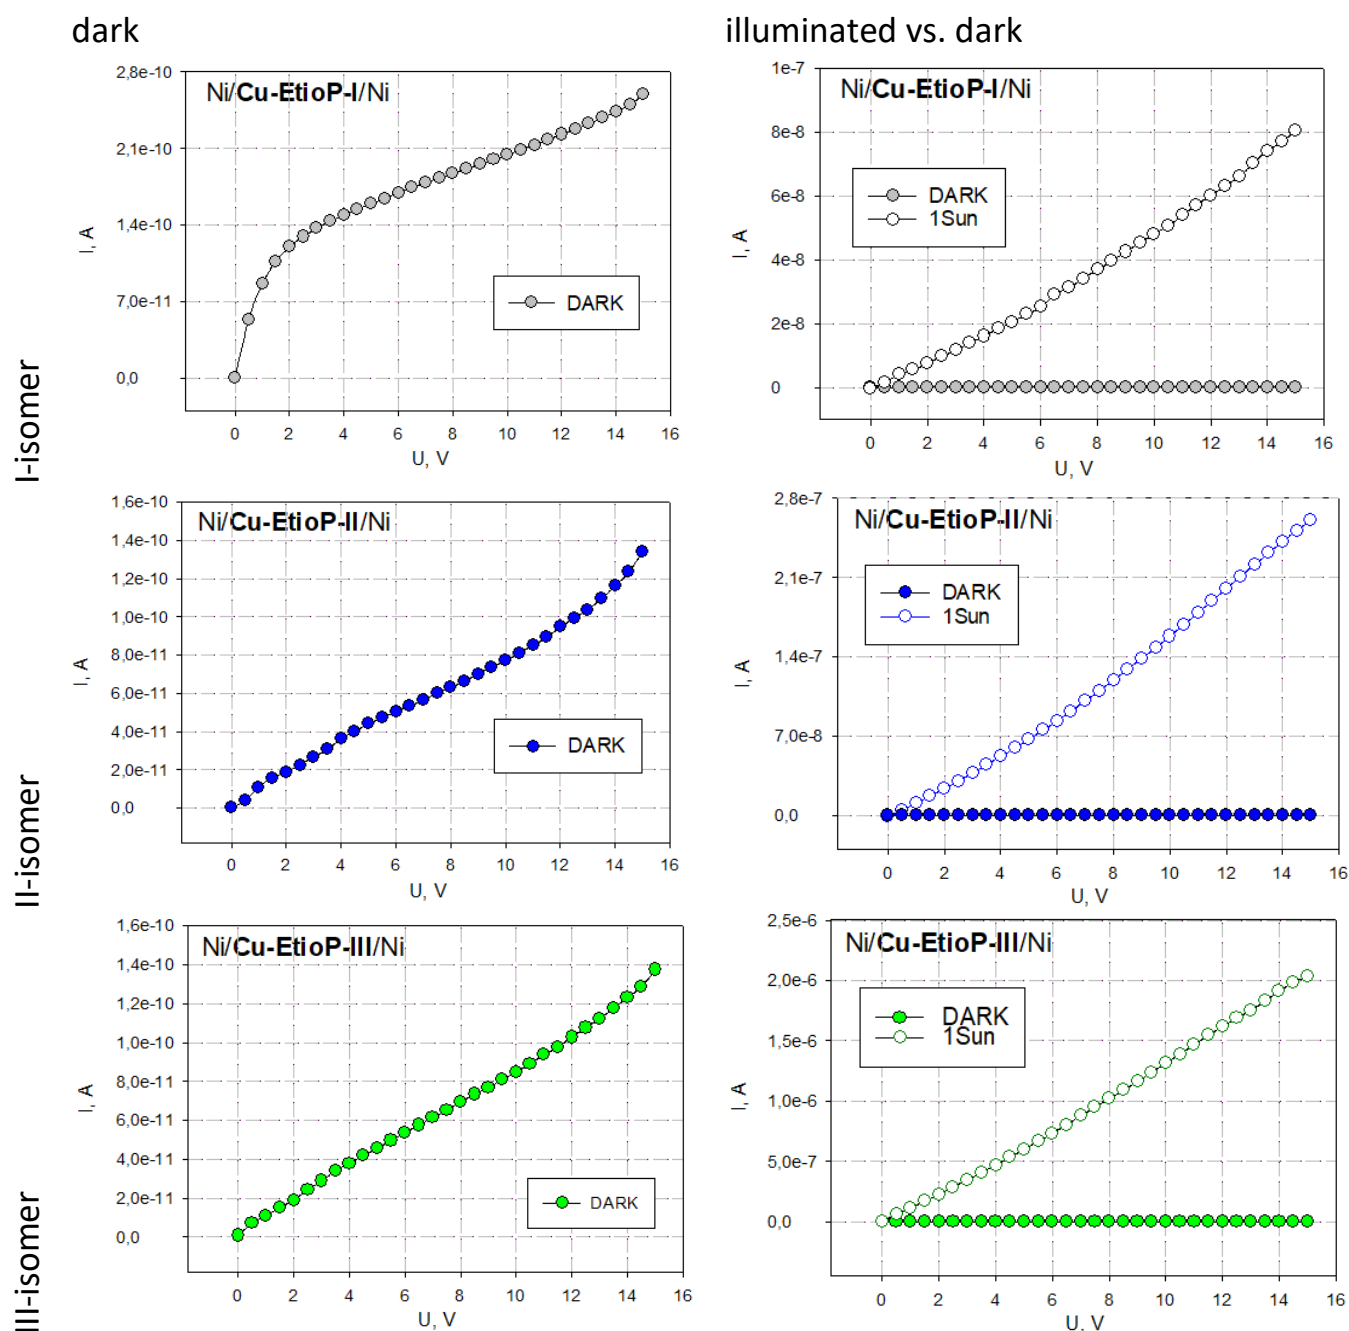

The tentative band diagram of the device, the HOMO-LUMO values are estimated from CV (to be published elsewhere)

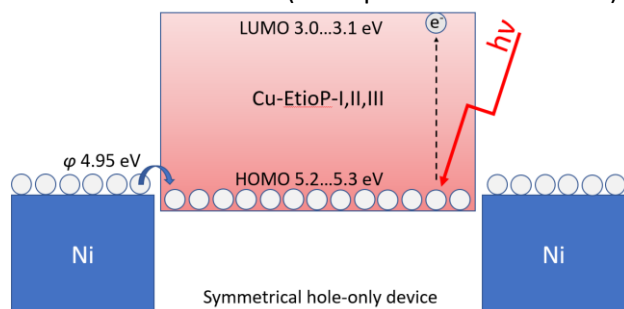

Example of an Arrhenius plot for the Cu-EtioP-II film →

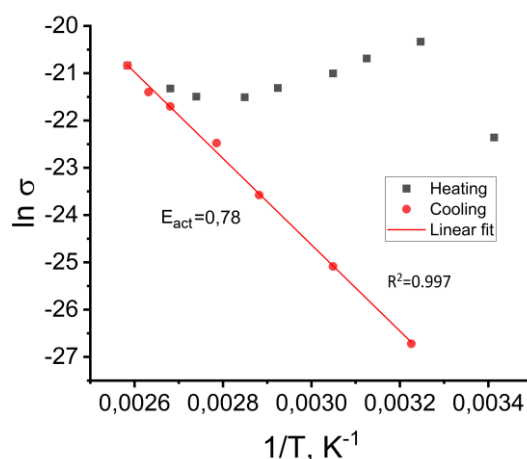

**Table S1****Crystal data, details of data collection, and parameters of structure refinement**

| Parameter                                                                   | Value                                                                     |
|-----------------------------------------------------------------------------|---------------------------------------------------------------------------|
| Formula                                                                     | C <sub>32</sub> H <sub>34</sub> CuN <sub>4</sub>                          |
| CCDC                                                                        | 2201607                                                                   |
| M                                                                           | 538.17                                                                    |
| System, Z                                                                   | monoclinic, 2                                                             |
| Space group                                                                 | P 2 <sub>1</sub> /c                                                       |
| T, K                                                                        | 100(2)                                                                    |
| a, Å                                                                        | 4.6803(6)                                                                 |
| b, Å                                                                        | 20.039(2)                                                                 |
| c, Å                                                                        | 14.846(2)                                                                 |
| α, °                                                                        | 90                                                                        |
| β, °                                                                        | 108.483(14)                                                               |
| γ, °                                                                        | 90                                                                        |
| V, Å <sup>3</sup>                                                           | 1320.6(3)                                                                 |
| D <sub>x</sub> , g·cm <sup>-3</sup>                                         | 1.353                                                                     |
| μ, mm <sup>-1</sup>                                                         | 0.855                                                                     |
| Absorption T T <sub>min</sub> /T <sub>max</sub>                             | 0.443 / 1.000                                                             |
| Absorption correction                                                       | Gaussian                                                                  |
| F(000)                                                                      | 566                                                                       |
| Size, mm                                                                    | 0.514 × 0.065 × 0.044                                                     |
| Diffractometer / Radiation / Monochromator / Scan                           | Rigaku XtaLab, MM003, P200K / MoKα, λ= 0.71073 Å / MicroMax-003 / ω scans |
| Range of θ, °                                                               | 4.318 - 26.371                                                            |
| Range of indices                                                            | -5 ≤ h ≤ 5<br>-25 ≤ k ≤ 25<br>-18 ≤ l ≤ 18                                |
| Measured reflections, all / independent / with I > 2σ(I) / R <sub>int</sub> | 10915 / 2546 / 1230 / 0.1626                                              |
| Parameters                                                                  | 185                                                                       |
| GOOF                                                                        | 0.956                                                                     |
| R-factors for F <sup>2</sup> > 2 σ(F <sup>2</sup> )                         | R <sub>1</sub> = 0.0929<br>wR <sub>2</sub> = 0.1935                       |
| R-factors for all reflexes                                                  | R <sub>1</sub> = 0.1807<br>wR <sub>2</sub> = 0.2254                       |
| Δρ(min/max), e·Å <sup>-3</sup>                                              | -0.494 / 1.223                                                            |

**Table S2****The atom list for C<sub>32</sub>H<sub>34</sub>CuN<sub>4</sub>**

| Atom | x          | y         | z         | Occupancy | Ueq, Å <sup>2</sup> |
|------|------------|-----------|-----------|-----------|---------------------|
| C1   | 0.8358(16) | 0.4550(4) | 0.2929(5) | 1         | 0.0435(18)          |
| C2   | 0.6471(16) | 0.4055(3) | 0.3054(5) | 1         | 0.049(2)            |
| C3   | 0.5892(14) | 0.3906(3) | 0.3891(5) | 1         | 0.0402(18)          |
| C4   | 0.3894(16) | 0.3387(3) | 0.3987(5) | 1         | 0.047(2)            |
| C5   | 0.3883(15) | 0.3400(4) | 0.4889(6) | 1         | 0.047(2)            |
| C6   | 0.5868(15) | 0.3927(3) | 0.5367(5) | 1         | 0.0422(18)          |
| C7   | 0.6521(15) | 0.4108(3) | 0.6306(5) | 1         | 0.0425(18)          |
| C8   | 0.8454(16) | 0.4613(4) | 0.6779(5) | 1         | 0.0417(18)          |
| C9   | 0.9123(18) | 0.4779(4) | 0.7771(5) | 1         | 0.052(2)            |
| C10  | 1.1054(18) | 0.5294(4) | 0.7949(5) | 1         | 0.051(2)            |
| C11  | 1.236(2)   | 0.5670(4) | 0.8882(5) | 1         | 0.076(3)            |
| C12  | 0.789(2)   | 0.4414(4) | 0.8457(5) | 1         | 0.064(2)            |

|      |            |            |            |          |            |
|------|------------|------------|------------|----------|------------|
| C13  | 0.955(3)   | 0.3817(6)  | 0.8854(7)  | 0.833(3) | 0.093(4)   |
| C14  | 0.2243(16) | 0.2945(4)  | 0.5361(5)  | 1        | 0.053(2)   |
| C15  | 0.418(3)   | 0.2372(6)  | 0.5794(9)  | 0.658(3) | 0.068(4)   |
| C16  | 0.2266(17) | 0.2894(3)  | 0.3221(5)  | 1        | 0.053(2)   |
| C17  | 0.379(4)   | 0.2288(10) | 0.3160(13) | 0.509(3) | 0.101(7)   |
| Cu1  | 1.000000   | 0.500000   | 0.500000   | 1        | 0.0413(4)  |
| H2   | 0.547209   | 0.379077   | 0.251482   | 1        | 0.059      |
| H7   | 0.554435   | 0.386088   | 0.666942   | 1        | 0.051      |
| H11A | 1.452215   | 0.573814   | 0.900826   | 1        | 0.113      |
| H11B | 1.203025   | 0.541021   | 0.940024   | 1        | 0.113      |
| H11C | 1.135560   | 0.610408   | 0.883878   | 1        | 0.113      |
| H12A | 0.790378   | 0.472004   | 0.898233   | 1        | 0.077      |
| H12B | 0.576340   | 0.429127   | 0.812441   | 1        | 0.077      |
| H13A | 0.829286   | 0.353012   | 0.911070   | 0.833(3) | 0.139      |
| H13B | 1.138231   | 0.393971   | 0.936429   | 0.833(3) | 0.139      |
| H13C | 1.008543   | 0.357623   | 0.835669   | 0.833(3) | 0.139      |
| H14A | 0.168591   | 0.319323   | 0.585686   | 1        | 0.063      |
| H14B | 0.036913   | 0.278231   | 0.488609   | 1        | 0.063      |
| H15A | 0.301861   | 0.204937   | 0.603017   | 0.658(3) | 0.102      |
| H15B | 0.590088   | 0.252909   | 0.632177   | 0.658(3) | 0.102      |
| H15C | 0.491780   | 0.215786   | 0.531552   | 0.658(3) | 0.102      |
| H16A | 0.033061   | 0.277750   | 0.331916   | 1        | 0.064      |
| H16B | 0.177958   | 0.312317   | 0.259955   | 1        | 0.064      |
| H17A | 0.290638   | 0.209330   | 0.252679   | 0.509(3) | 0.152      |
| H17B | 0.357833   | 0.197412   | 0.364069   | 0.509(3) | 0.152      |
| H17C | 0.592844   | 0.238099   | 0.327009   | 0.509(3) | 0.152      |
| N1   | 0.7100(12) | 0.4241(3)  | 0.4729(4)  | 1        | 0.0410(15) |
| N2   | 1.0016(11) | 0.5018(3)  | 0.6357(4)  | 1        | 0.0444(14) |

**Table S3**

**Interatomic distances for C<sub>32</sub>H<sub>34</sub>CuN<sub>4</sub>**

| Atoms                   | Distance, Å | Atoms                   | Distance, Å | Atoms     | Distance, Å |
|-------------------------|-------------|-------------------------|-------------|-----------|-------------|
| Cu1 – N1                | 1.993(5)    | C6 – C5                 | 1.437(10)   | C14 – C15 | 1.479(12)   |
| Cu1 – N1 <sup>(i)</sup> | 1.993(5)    | C8 – N2                 | 1.370(9)    | C14 – C5  | 1.500(10)   |
| Cu1 – N2                | 2.013(6)    | C8 – C7                 | 1.390(9)    | C9 – C10  | 1.342(10)   |
| Cu1 – N2 <sup>(i)</sup> | 2.013(6)    | C8 – C9                 | 1.444(9)    | C9 – C12  | 1.511(10)   |
| C3 – N1                 | 1.368(8)    | C1 – C2                 | 1.379(10)   | C10 – C11 | 1.525(10)   |
| C3 – C2                 | 1.386(10)   | C1 <sup>(i)</sup> – N2  | 1.392(8)    | C12 – C13 | 1.446(12)   |
| C3 – C4                 | 1.434(10)   | C1 – C10 <sup>(i)</sup> | 1.449(10)   | C16 – C17 | 1.425(19)   |
| C6 – C7                 | 1.377(9)    | C4 – C5                 | 1.341(10)   |           |             |
| C6 – N1                 | 1.405(9)    | C4 – C16                | 1.518(9)    |           |             |

Symmetry codes: i) -x+2, -y+1, -z+1;

**Table S4**

**Valence angles for C<sub>32</sub>H<sub>34</sub>CuN<sub>4</sub>**

| Atoms                                       | Angle, ° | Atoms                        | Angle, ° | Atoms                         | Angle, ° |
|---------------------------------------------|----------|------------------------------|----------|-------------------------------|----------|
| N1 <sup>(i)</sup> – Cu1 – N2                | 89.9(2)  | C2 – C1 – C10 <sup>(i)</sup> | 126.1(7) | N2 – C8 – C7                  | 123.8(7) |
| N1 – Cu1 – N2 <sup>(i)</sup>                | 89.9(2)  | N1 – C3 – C4                 | 111.1(7) | C7 – C8 – C9                  | 125.4(7) |
| N1 – Cu1 – N2                               | 90.1(2)  | C2 – C3 – C4                 | 124.3(7) | C10 – C9 – C8                 | 107.0(7) |
| N1 <sup>(i)</sup> – Cu1 – N2 <sup>(i)</sup> | 90.1(2)  | N1 – C3 – C2                 | 124.5(7) | C8 – C9 – C12                 | 124.8(8) |
| N1 – Cu1 – N1 <sup>(i)</sup>                | 180.0(2) | C5 – C4 – C3                 | 107.1(6) | C10 – C9 – C12                | 128.1(7) |
| N2 – Cu1 – N2 <sup>(i)</sup>                | 180.0    | C3 – C4 – C16                | 125.9(7) | C9 – C10 – C1 <sup>(i)</sup>  | 107.3(7) |
| C3 – N1 – C6                                | 104.6(6) | C5 – C4 – C16                | 126.9(7) | C1 <sup>(i)</sup> – C10 – C11 | 125.1(8) |
| C6 – N1 – Cu1                               | 127.2(5) | C4 – C5 – C6                 | 107.5(7) | C9 – C10 – C11                | 127.6(8) |



|                                             |          |               |          |                |          |
|---------------------------------------------|----------|---------------|----------|----------------|----------|
| C3 – N1 – Cu1                               | 128.1(5) | C6 – C5 – C14 | 124.2(7) | C1 – C2 – C3   | 126.3(6) |
| C8 – N2 – C1 <sup>(i)</sup>                 | 105.3(6) | C4 – C5 – C14 | 128.3(7) | C6 – C7 – C8   | 127.1(7) |
| C1 <sup>(i)</sup> – N2 – Cu1                | 126.9(5) | N1 – C6 – C5  | 109.6(6) | C13 – C12 – C9 | 113.8(8) |
| C8 – N2 – Cu1                               | 127.8(5) | C7 – C6 – N1  | 123.9(7) | C15 – C14 – C5 | 109.9(7) |
| N2 <sup>(i)</sup> – C1 – C10 <sup>(i)</sup> | 109.6(7) | C7 – C6 – C5  | 126.5(7) | C17 – C16 – C4 | 117.4(9) |
| C2 – C1 – N2 <sup>(i)</sup>                 | 124.3(7) | N2 – C8 – C9  | 110.8(7) |                |          |

Symmetry codes: i) -x+2, -y+1, -z+1;
